# Supplementary material for: The First Selenoanhydride in the Series of Chlorophyll a Derivatives, Its Stability and Photoinduced Cytotoxicity
Source: MDPI journal article supplement (doi:10.3390/molecules26237298), 2021-12-01
Supplement: s1 [file s1]

# **The First Selenoanhydride in the Series of Chlorophyll a Derivatives, Its Stability and Photoinduced Cytotoxicity**

Viktor Pogorilyy, Anna Plyutinskaya, Nikita Suvorov, Ekaterina Diachkova, Yuriy Vasil'ev, Andrei Pankratov, Andrey Mironov and Mikhail Grin

## **CONTENTS**

|                                                                                     |          |
|-------------------------------------------------------------------------------------|----------|
| <b>Instrumental procedures of analysis .....</b>                                    | <b>2</b> |
| <b>Photoinduced and dark activity of compounds 1, 3, 4, and purpurinimide .....</b> | <b>3</b> |

## Instrumental procedures of analysis

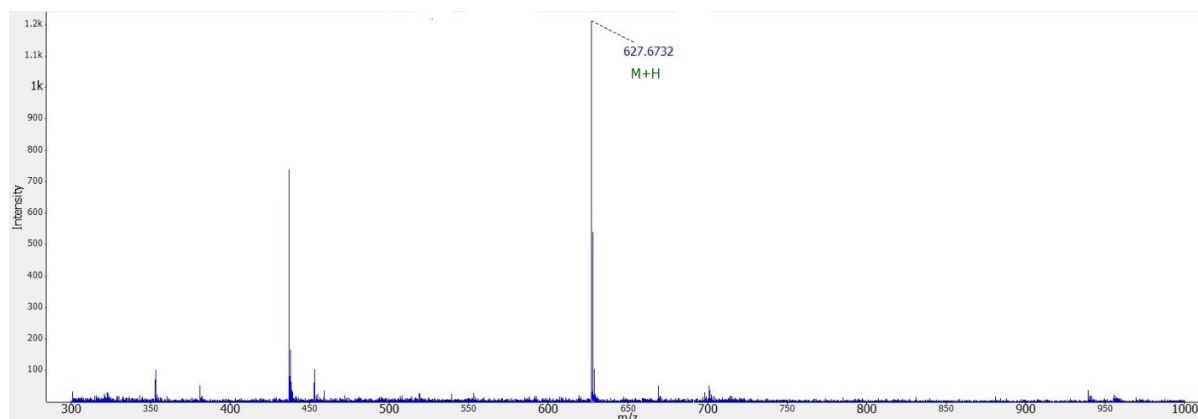

Figure S1. Mass spectrum of compound 4.

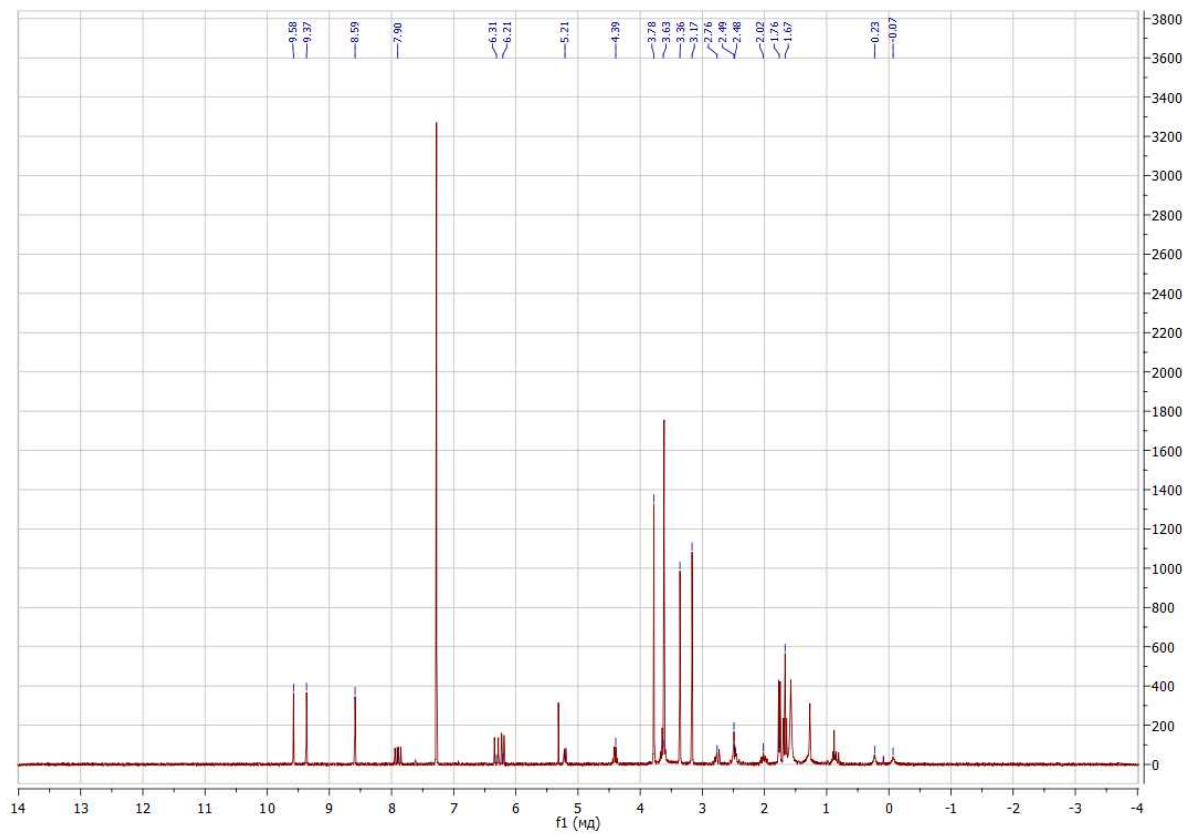

Figure S2.  $^1\text{H}$  NMR spectrum of compound 4.

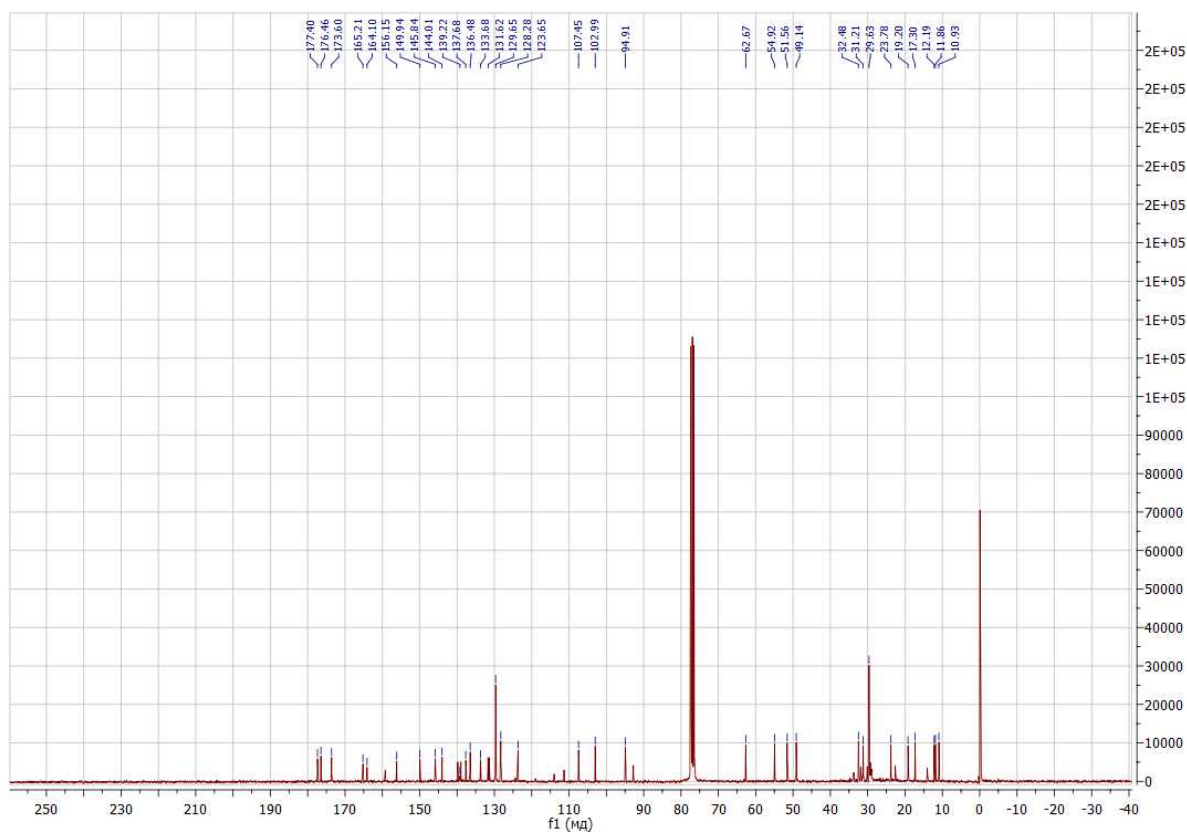

**Figure S3.**  $^{13}\text{C}$  NMR spectrum of compound **4**.

## Photoinduced and dark activity of compounds **1**, **3**, **4**, and purpurinimide

**Table S1.** Photoinduced activity of compounds **1**, **3**, **4**, and purpurinimide.

| Compounds     | Photo-induced activity                                       | Cytotoxic activity                                              |
|---------------|--------------------------------------------------------------|-----------------------------------------------------------------|
|               | IC <sub>50</sub> value with light exposure, $\mu\text{g/ml}$ | IC <sub>50</sub> value without light exposure, $\mu\text{g/ml}$ |
| <b>1</b>      | 0.43 $\pm$ 0.04                                              | 8.5 $\pm$ 1.1                                                   |
| purpurinimide | 0.44 $\pm$ 0.01                                              | 9.5 $\pm$ 1.6                                                   |
| <b>3</b>      | 0.14 $\pm$ 0.01                                              | 1.6 $\pm$ 0.2                                                   |
| <b>4</b>      | 0.21 $\pm$ 0.06                                              | 2.4 $\pm$ 0.2                                                   |
